# Supplementary material for: Deep Transfer Learning for the Multilabel Classification of Chest X-ray Images
Source: MDPI journal article supplement (doi:10.3390/diagnostics12061457), 2022-06-13
Supplement: s1 [file s1]

# Deep Transfer Learning for the Multilabel Classification of Chest X-ray Images—Supplementary Material

Guan-Hua Huang <sup>1,\*</sup>, Qi-Jia Fu <sup>1</sup>, Ming-Zhang Gu <sup>1</sup>, Nan-Han Lu <sup>2,3,4</sup>, Kuo-Ying Liu <sup>5</sup>  
and Tai-Been Chen <sup>1,4</sup>

<sup>1</sup> Institute of Statistics, National Yang Ming Chiao Tung University, Hsinchu 30010, Taiwan; qijia444@gmail.com (Q.-J.F.); eric956412@gmail.com (M.-Z.G.); ctb@isu.edu.tw (T.-B.C.)

<sup>2</sup> Department of Pharmacy, Tajen University, Pingtung City 90741, Taiwan; ed103911@edah.org.tw

<sup>3</sup> Department of Radiology, E-Da Hospital, I-Shou University, Kaohsiung City 82445, Taiwan

<sup>4</sup> Department of Medical Imaging and Radiological Science, I-Shou University, Kaohsiung City 82445, Taiwan

<sup>5</sup> Department of Radiology, E-Da Cancer Hospital, I-Shou University, Kaohsiung City 82445, Taiwan; ed102500@edah.org.tw

\* Correspondence: ghuang@nycu.edu.tw; Tel.: +886-3-513-1334

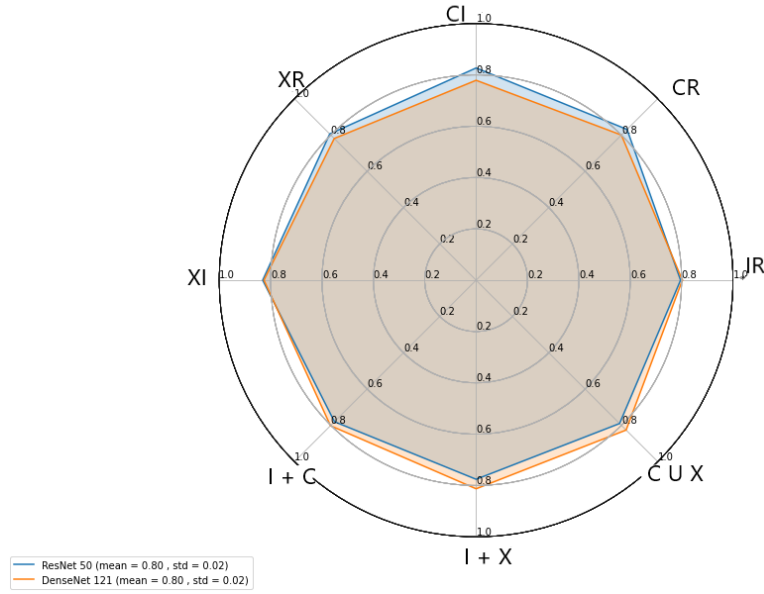

**Figure S1.** Radar plots for mean test AUCs from various transfer learning approaches. Abbreviations: IR = ImageNet pretraining with random initials, CR = ChestX-ray pretraining with random initials, CI = ChestX-ray pretraining with ImageNet pretraining initials, XR = CheXpert pretraining with random initials, XI = CheXpert pretraining with ImageNet pretraining initials, I + C = Concatenating ImageNet + ChestX-ray, I + X = Concatenating ImageNet + CheXpert, C ∪ X = Cotraining ChestX-ray + CheXpert.

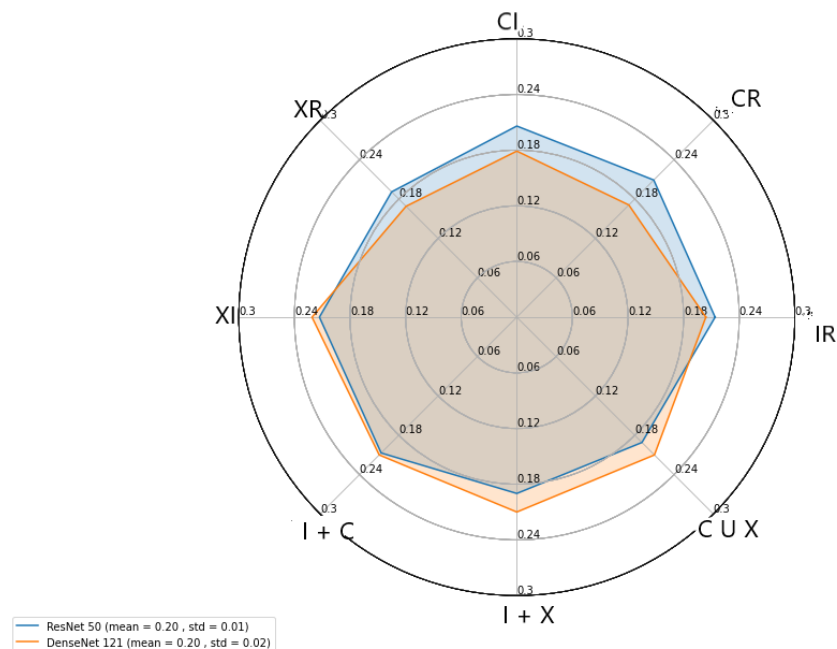

**Figure S2.** Radar plots for mean test APs from various transfer learning approaches. Abbreviations: IR = ImageNet pretraining with random initials, CR = ChestX-ray pretraining with random initials, CI = ChestX-ray pretraining with ImageNet pretraining initials, XR = CheXpert pretraining with random initials, XI = CheXpert pretraining with ImageNet pretraining initials, I + C = Concatenating ImageNet + ChestX-ray, I + X = Concatenating ImageNet + CheXpert, C U X = Cotraining ChestX-ray + CheXpert.

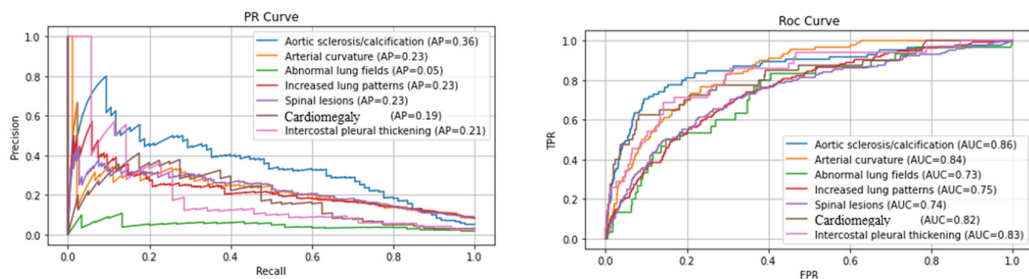

**Figure S3.** PR and ROC curves for each disease label in test data with initial weights from ImageNet pretraining with random initials in ResNet50.

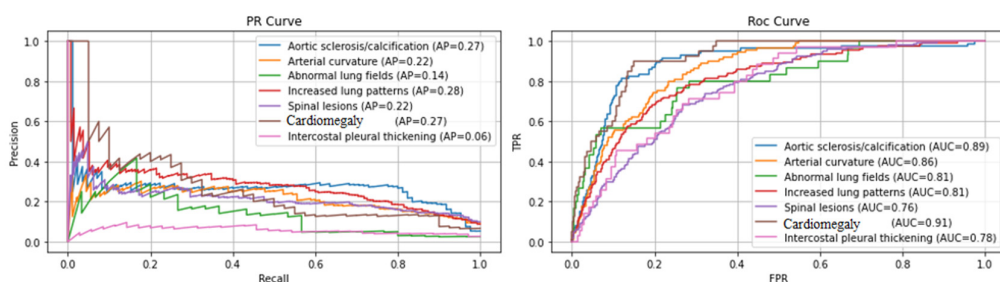

**Figure S4.** PR and ROC curves for each disease label in test data with initial weights from ChestX-ray pretraining with random initials in ResNet50.

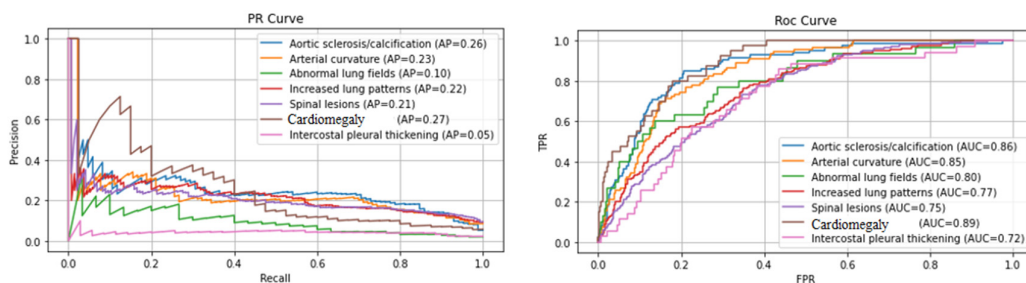

**Figure S5.** PR and ROC curves for each disease label in test data with initial weights from CheXpert pretraining with random initials in ResNet50.

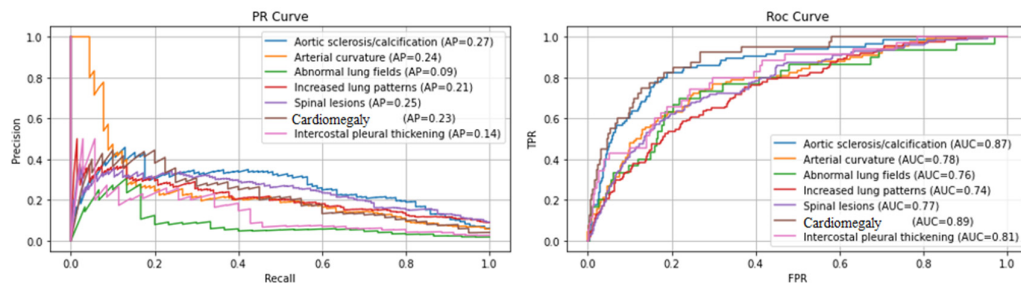

**Figure S6.** PR and ROC curves for each disease label in test data with initial weights from ImageNet pretraining with random initials in DenseNet121.

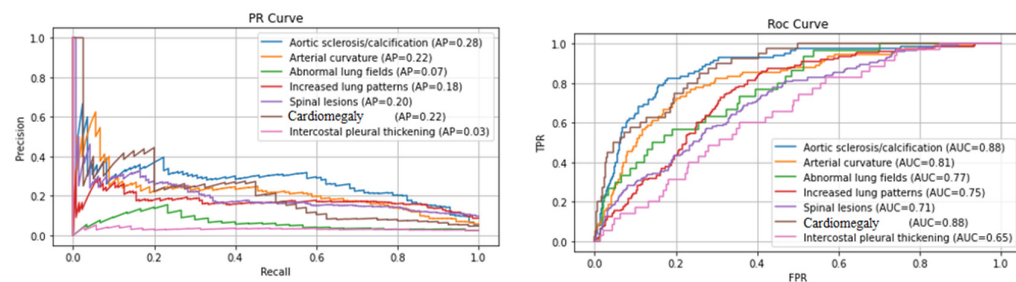

**Figure S7.** PR and ROC curves for each disease label in test data with initial weights from ChestX-ray pretraining with random initials in DenseNet121.

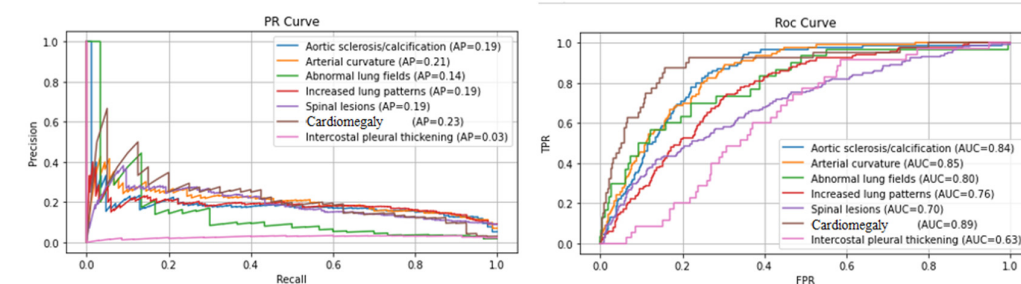

**Figure S8.** PR and ROC curves for each disease label in test data with initial weights from CheXpert pretraining with random initials in DenseNet121.

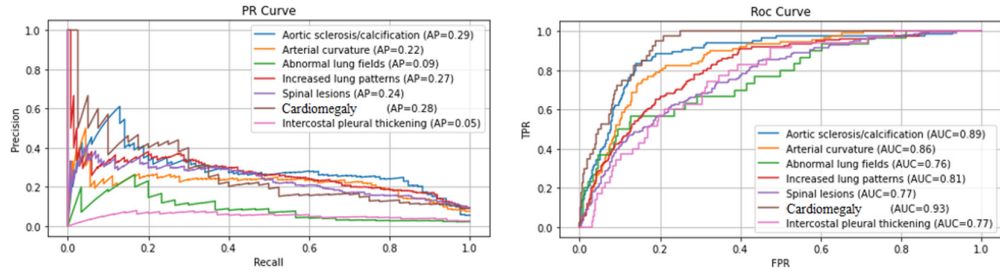

**Figure S9.** PR and ROC curves for each disease label in test data for initiating transfer learning with pretrained weights from ChestX-ray adopting ImageNet initials in ResNet50.

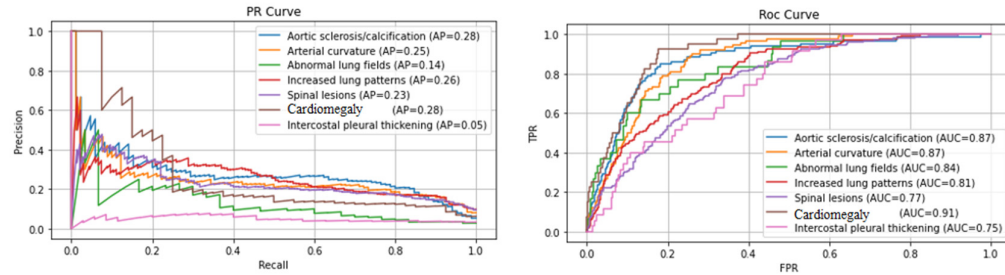

**Figure S10.** PR and ROC curves for each disease label in test data for initiating transfer learning with pretrained weights from CheXpert adopting ImageNet initials in ResNet50.

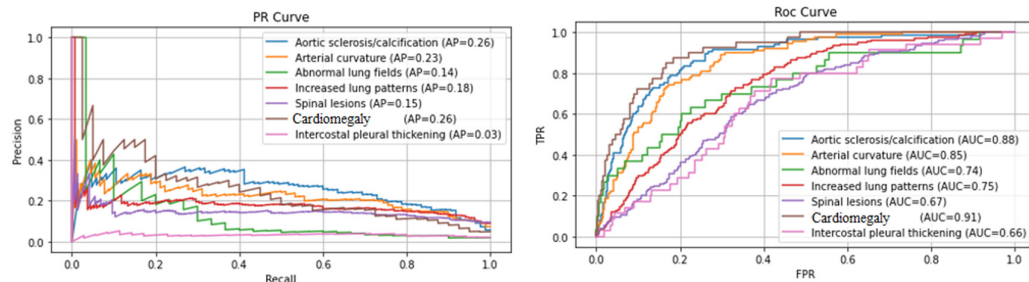

**Figure S11.** PR and ROC curves for each disease label in test data for initiating transfer learning with pretrained weights from ChestX-ray adopting ImageNet initials in DenseNet121.

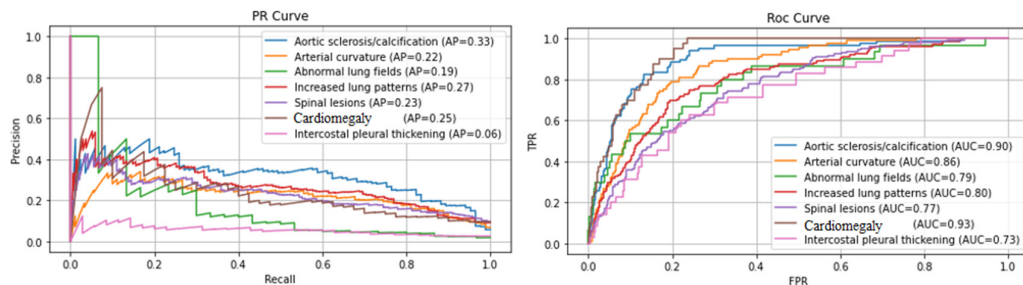

**Figure S12.** PR and ROC curves for each disease label in test data for initiating transfer learning with pretrained weights from CheXpert adopting ImageNet initials in DenseNet121.

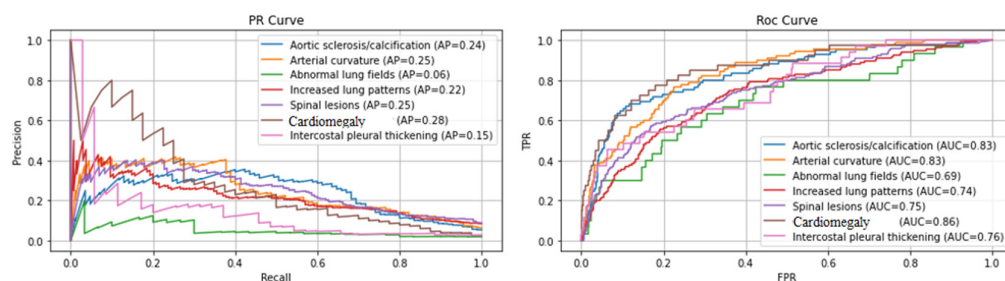

**Figure S13.** PR and ROC curves for each disease label in test data for concatenating transfer learning of ImageNet + ChestX-ray in ResNet50.

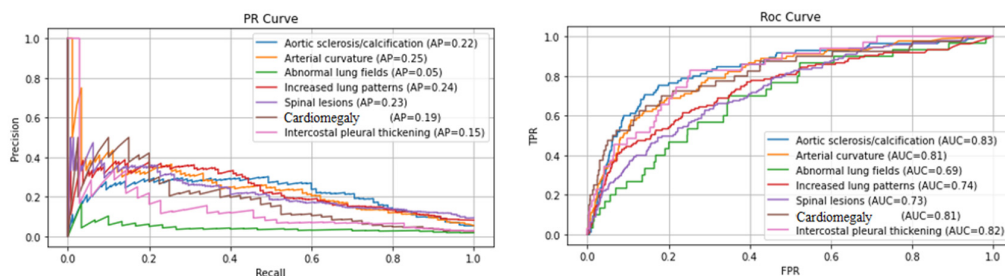

**Figure S14.** PR and ROC curves for each disease label in test data for concatenating transfer learning of ImageNet + CheXpert in ResNet50.

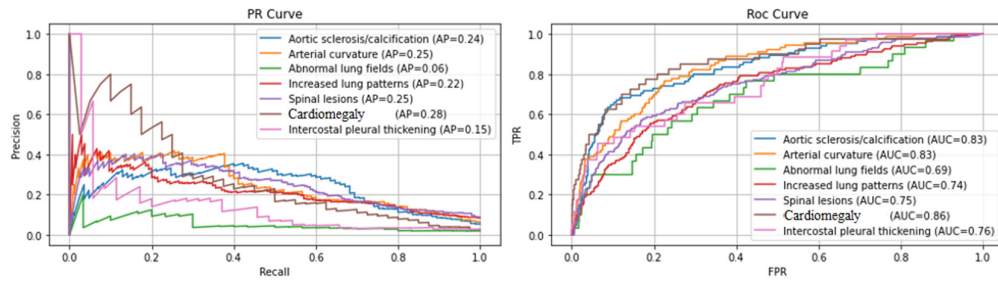

**Figure S15.** PR and ROC curves for each disease label in test data for concatenating transfer learning of ImageNet + ChestX-ray in DenseNet121.

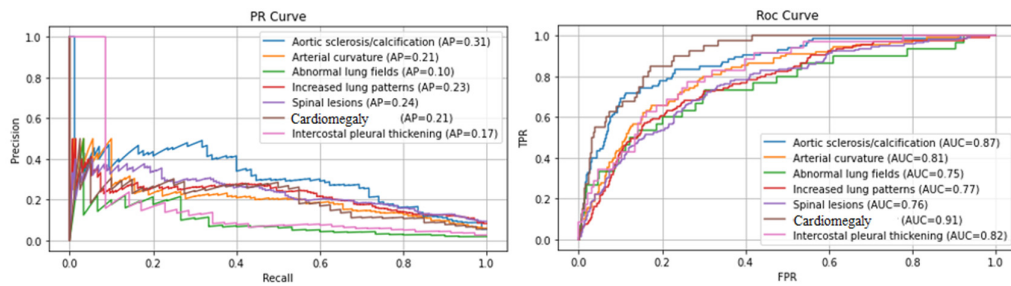

**Figure S16.** PR and ROC curves for each disease label in test data for concatenating transfer learning of ImageNet + CheXpert in DenseNet121.

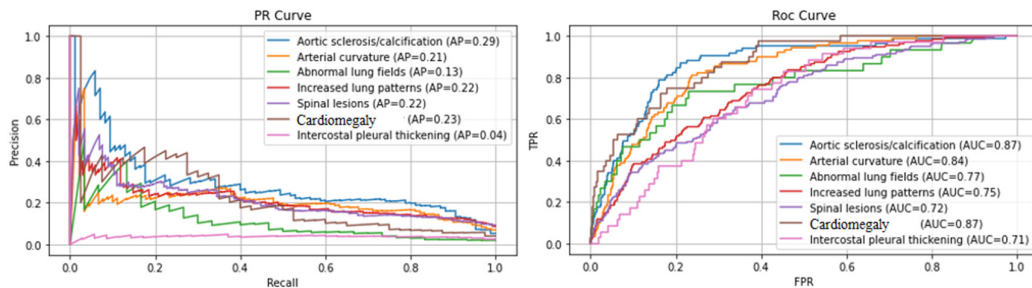

**Figure S17.** PR and ROC curves for each disease label in test data for co-training transfer learning of ChestX-ray + CheXpert in ResNet50.



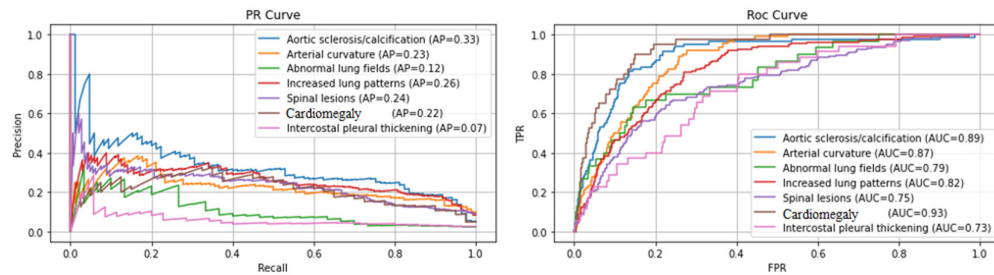

**Figure S18.** PR and ROC curves for each disease label in test data for co-training transfer learning of ChestX-ray + CheXpert in DenseNet121.
